# Supplementary material for: False negative computed tomography scan due to pelvic binder in a patient with pelvic disruption: a case report and review of the literature
Source: Springer Nature journal article supplement (doi:10.1186/s13256-018-1808-7), 2018-09-04
Supplement: MOESM1 [file 16143536]

**Previously healthy 49 year old motocyclist**

**28<sup>th</sup> June 2017**

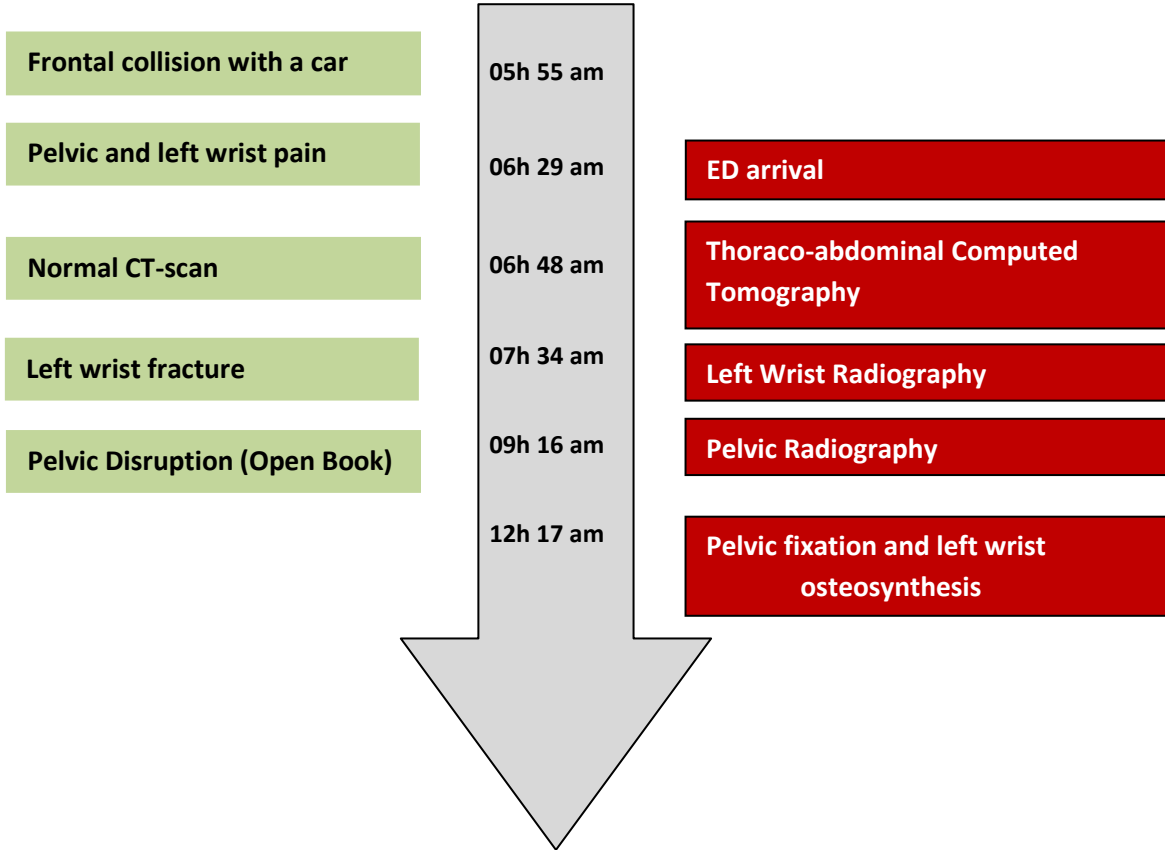

**Discharged 7<sup>th</sup> July 2017**
